# Supplementary material
Source: PubMed Central journal article supplement (PMC8046715)
Supplement: NIHMS1662274-supplement-2.pdf [file NIHMS1662274-supplement-2.pdf]

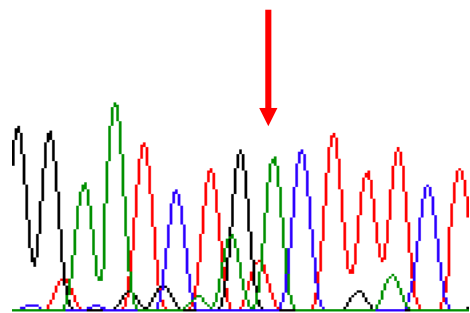

L7  
c.231A>T, p.R77S

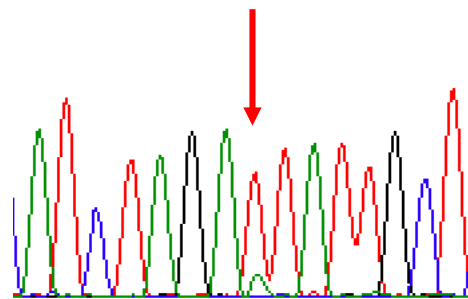

ML162  
c.1952T>A, p. 651 I>N

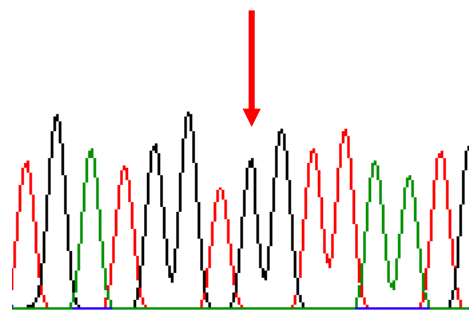

L90  
c.1081T>C, p.Y361H

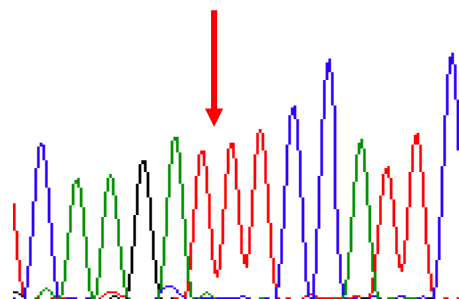

L107  
splicing variants  
missing exon 6

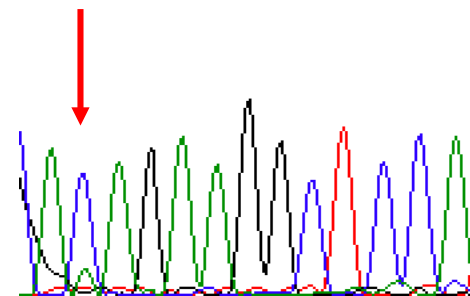

L119  
c.1298A>C, p.K433T

Figure S1

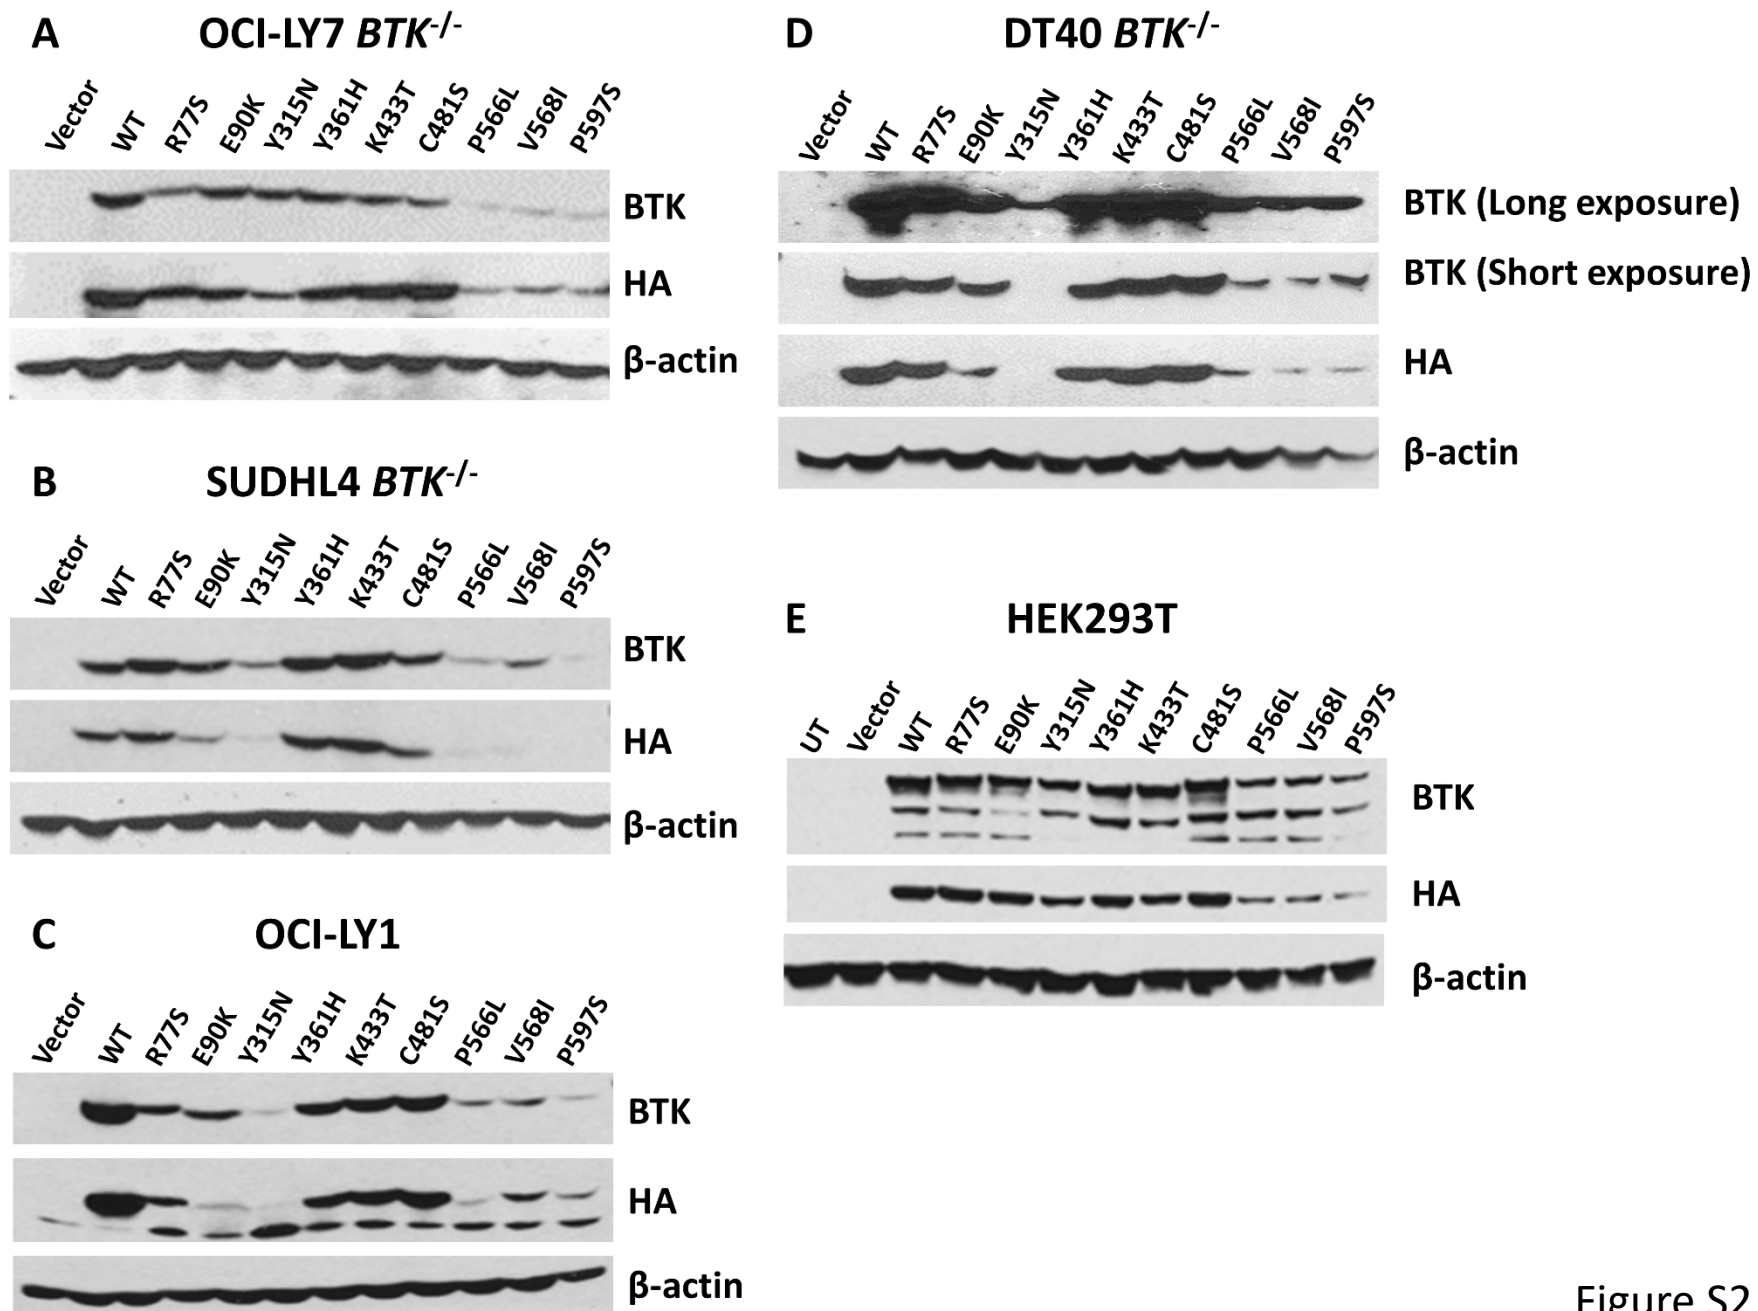

Figure S2

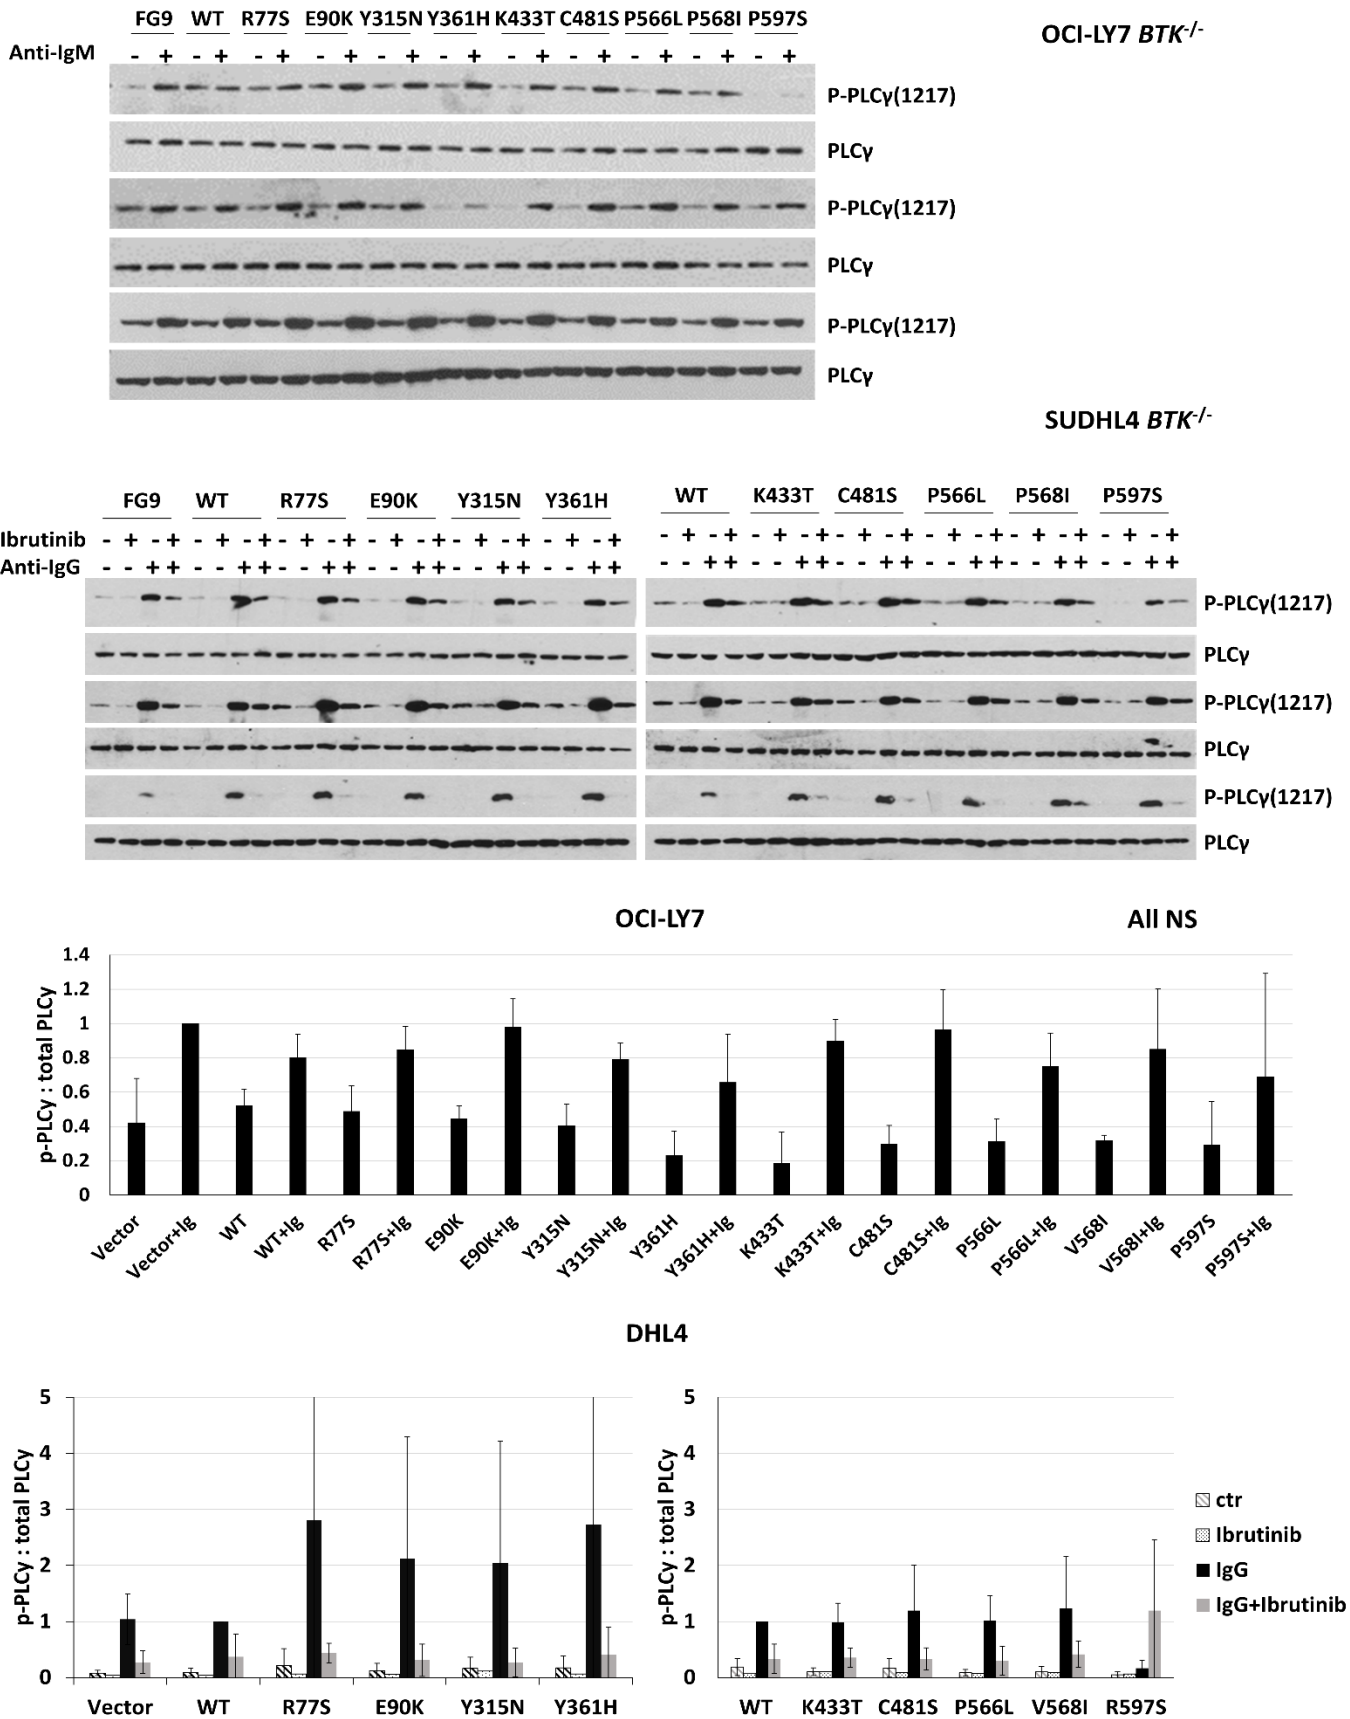

Figure S3

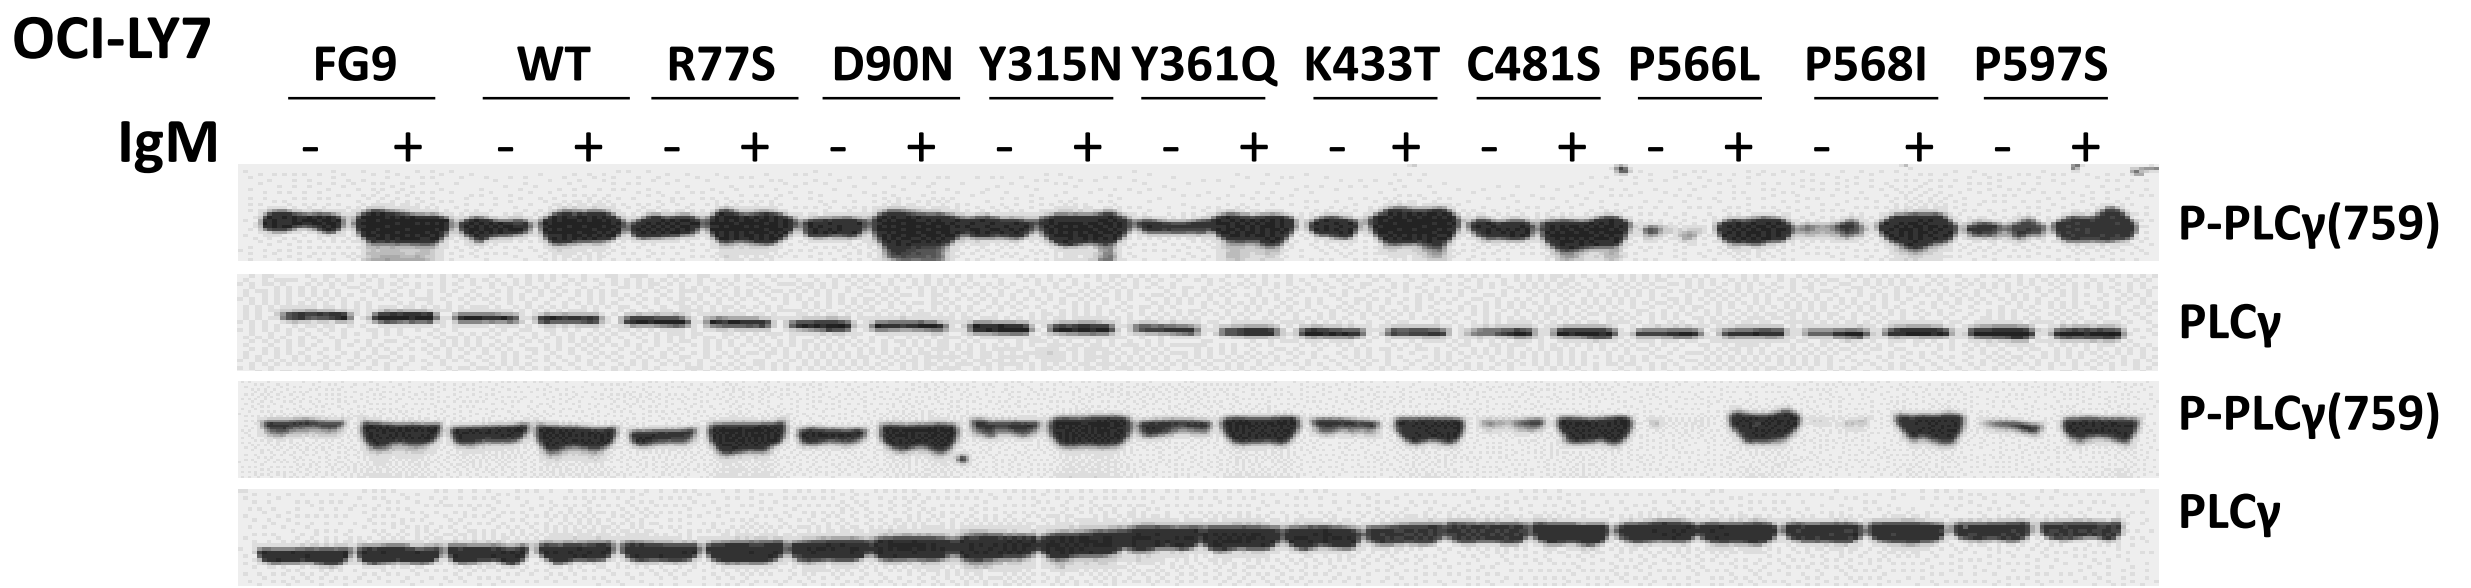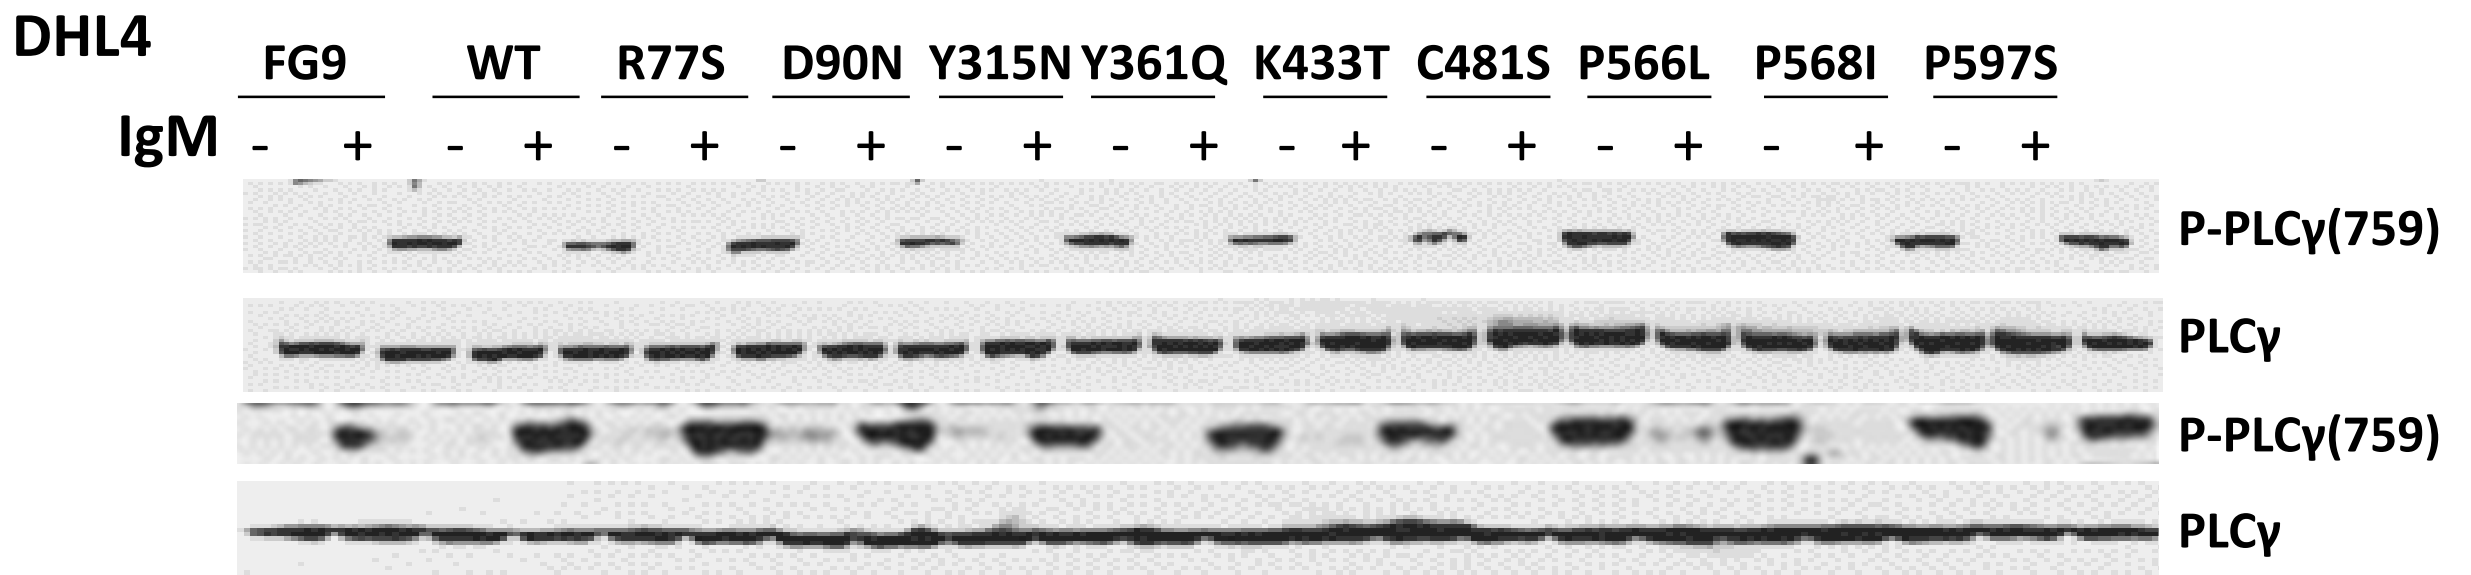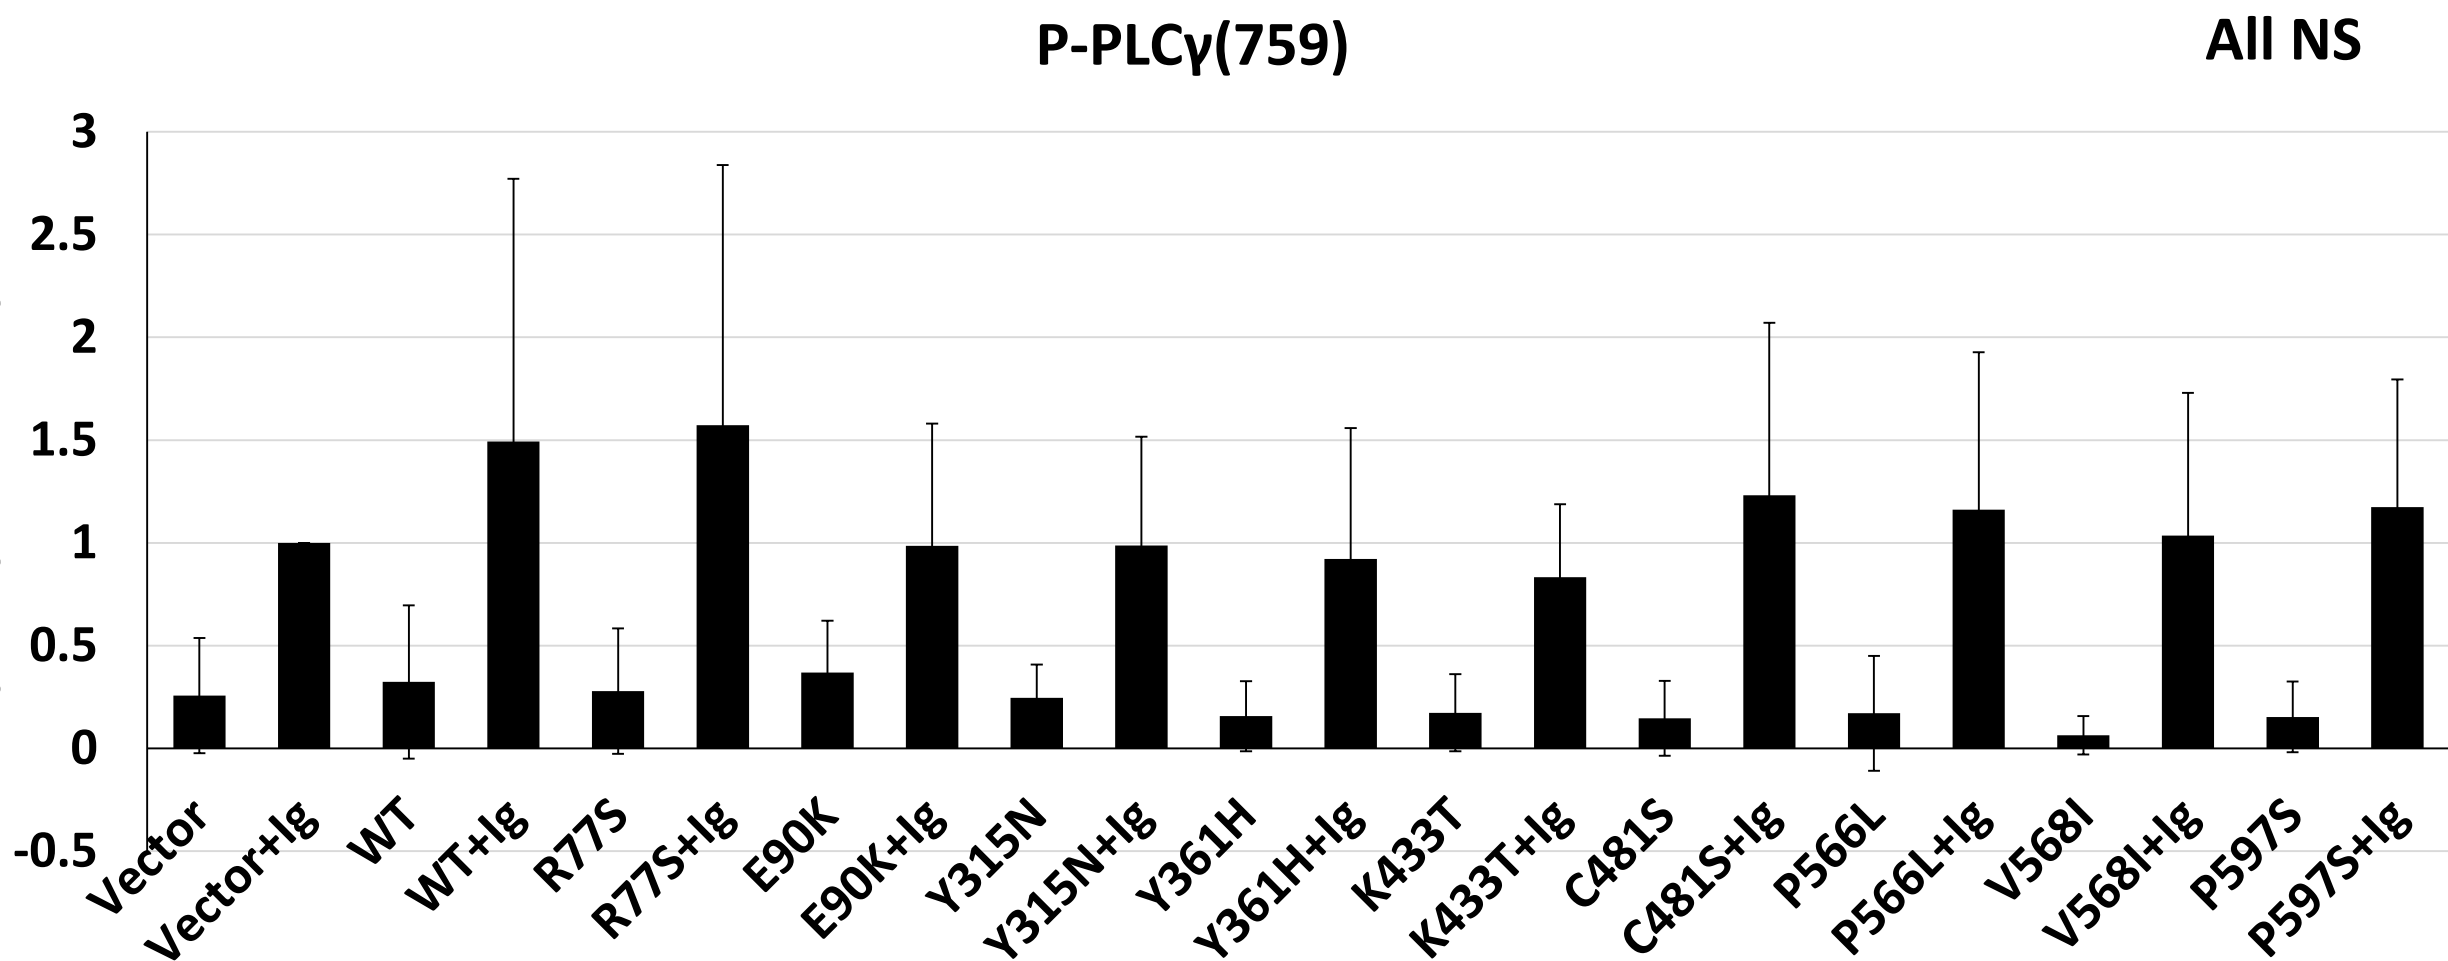

Figure S4

**OCI-LY7 *BTK*<sup>-/-</sup> *BLK*<sup>-/-</sup>**

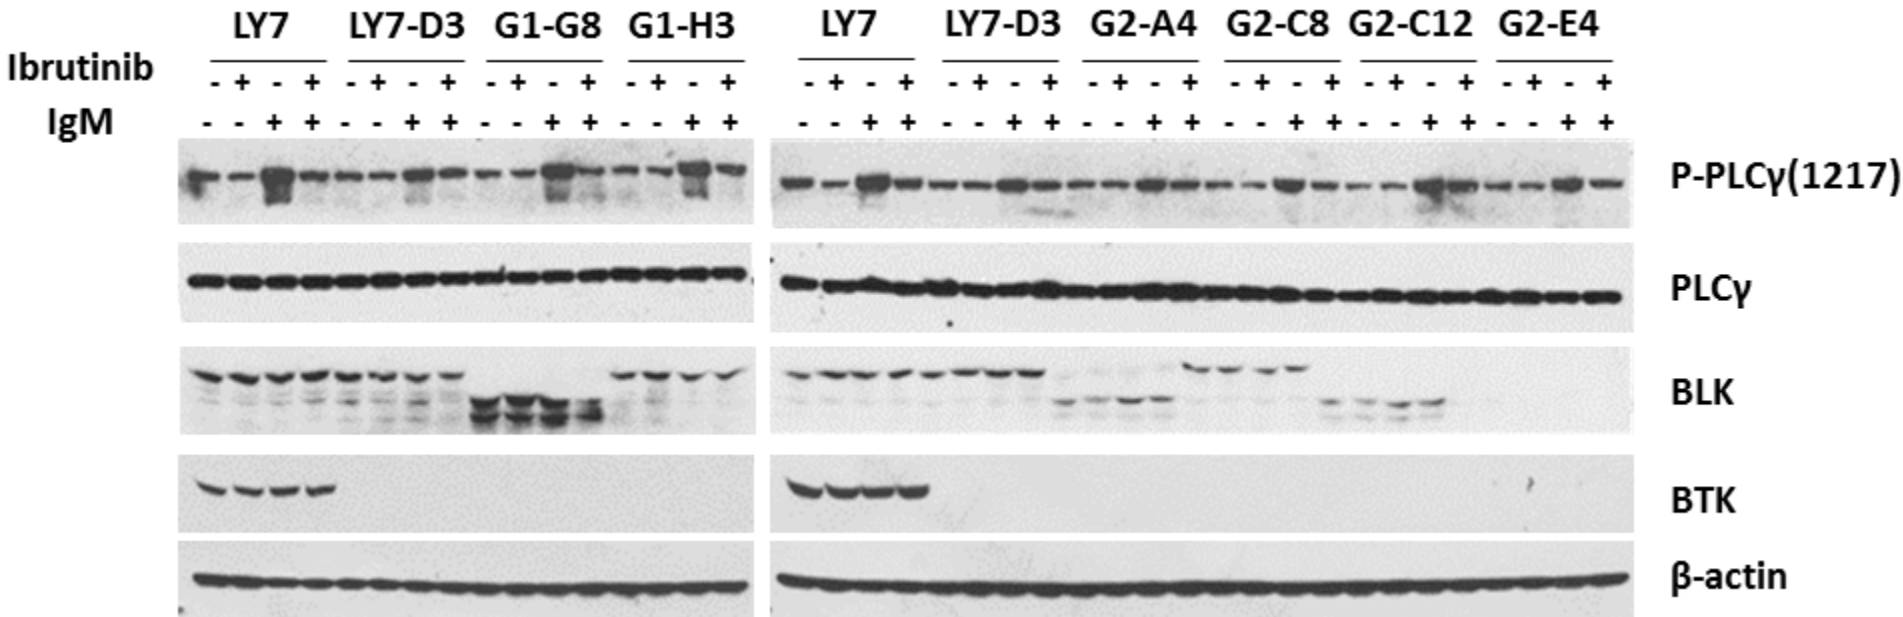

Figure S5

## OCI-LY7 BTK<sup>-/-</sup> BLK<sup>-/-</sup>

## SUDHL4 BTK<sup>-/-</sup> BLK<sup>-/-</sup>

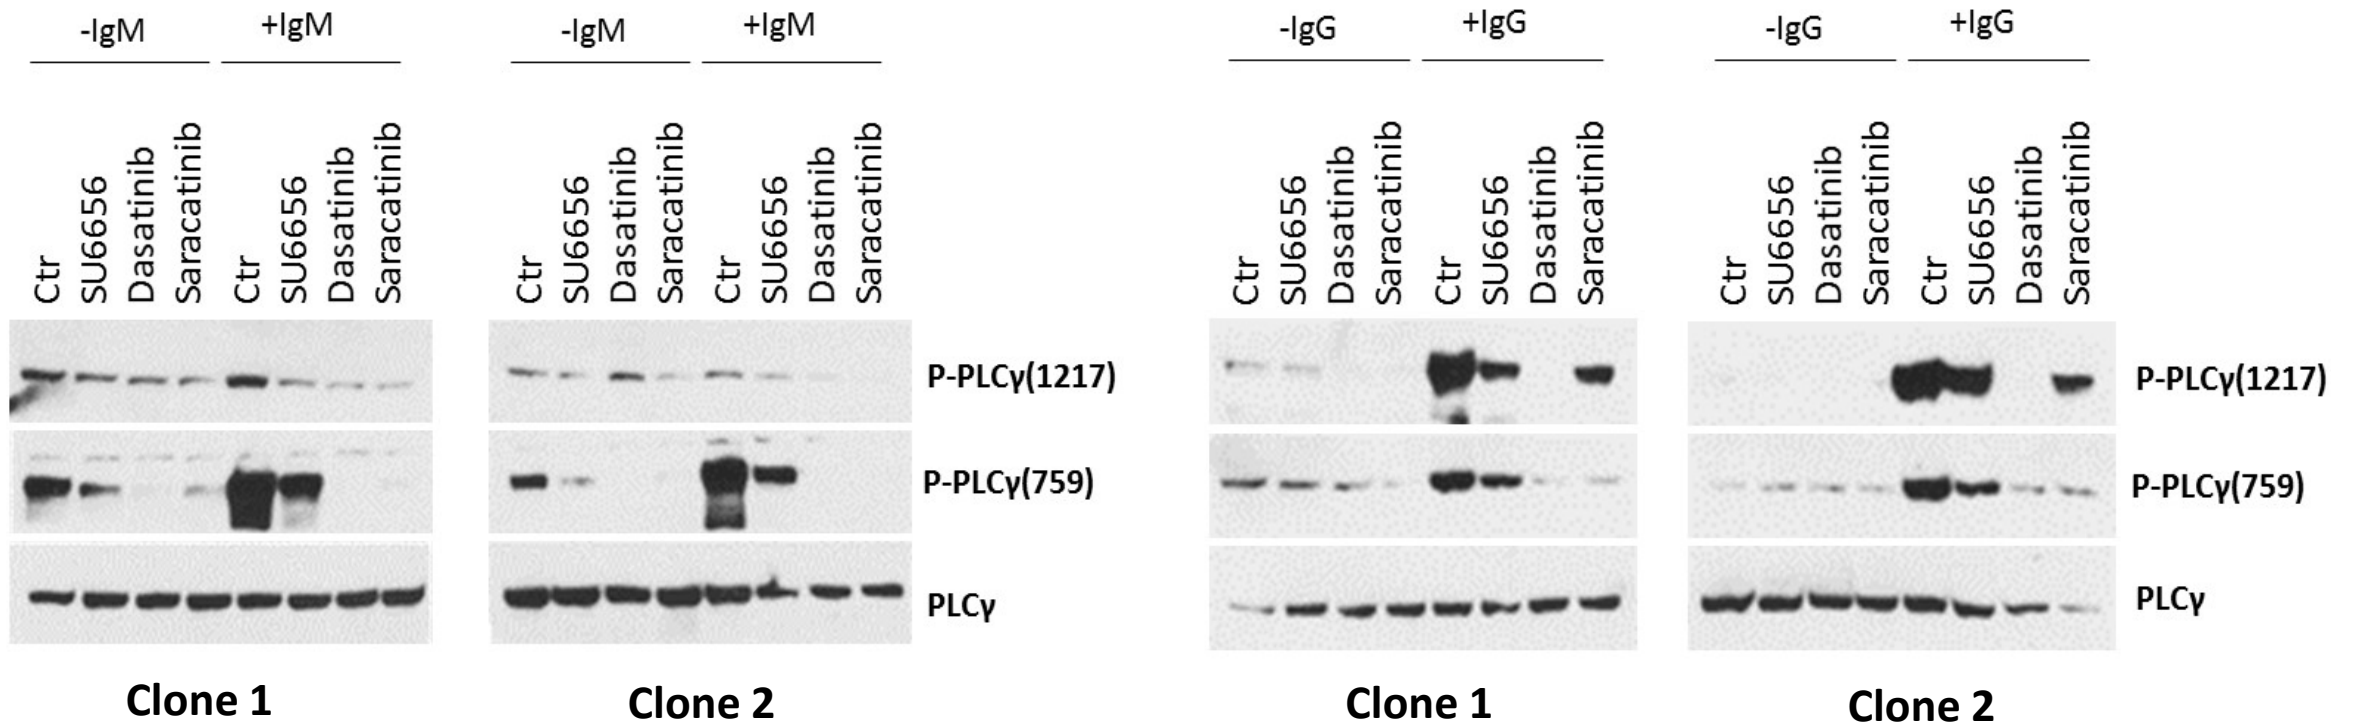

Figure S6

## A OCI-LY7 *BTK*<sup>-/-</sup>

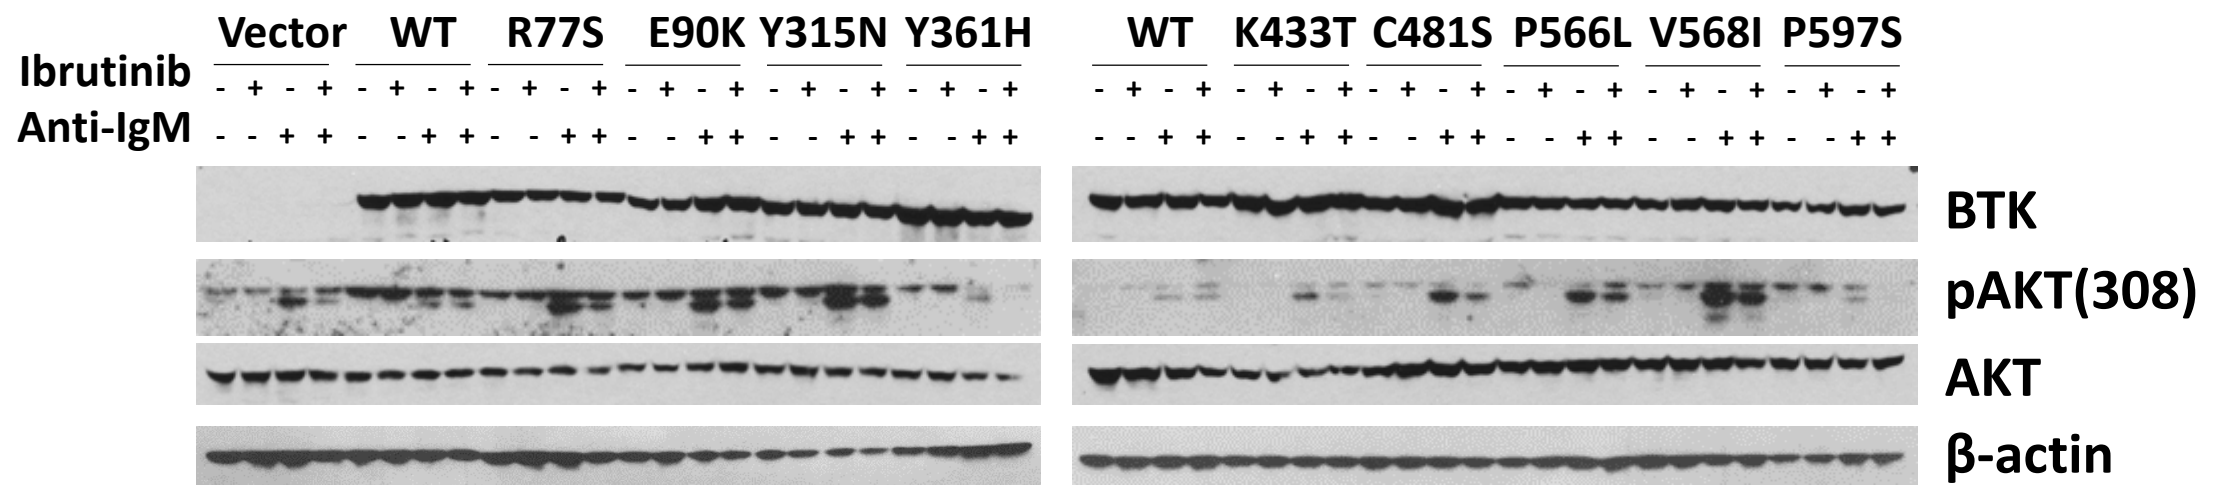

## B SUDHL4 *BTK*<sup>-/-</sup>

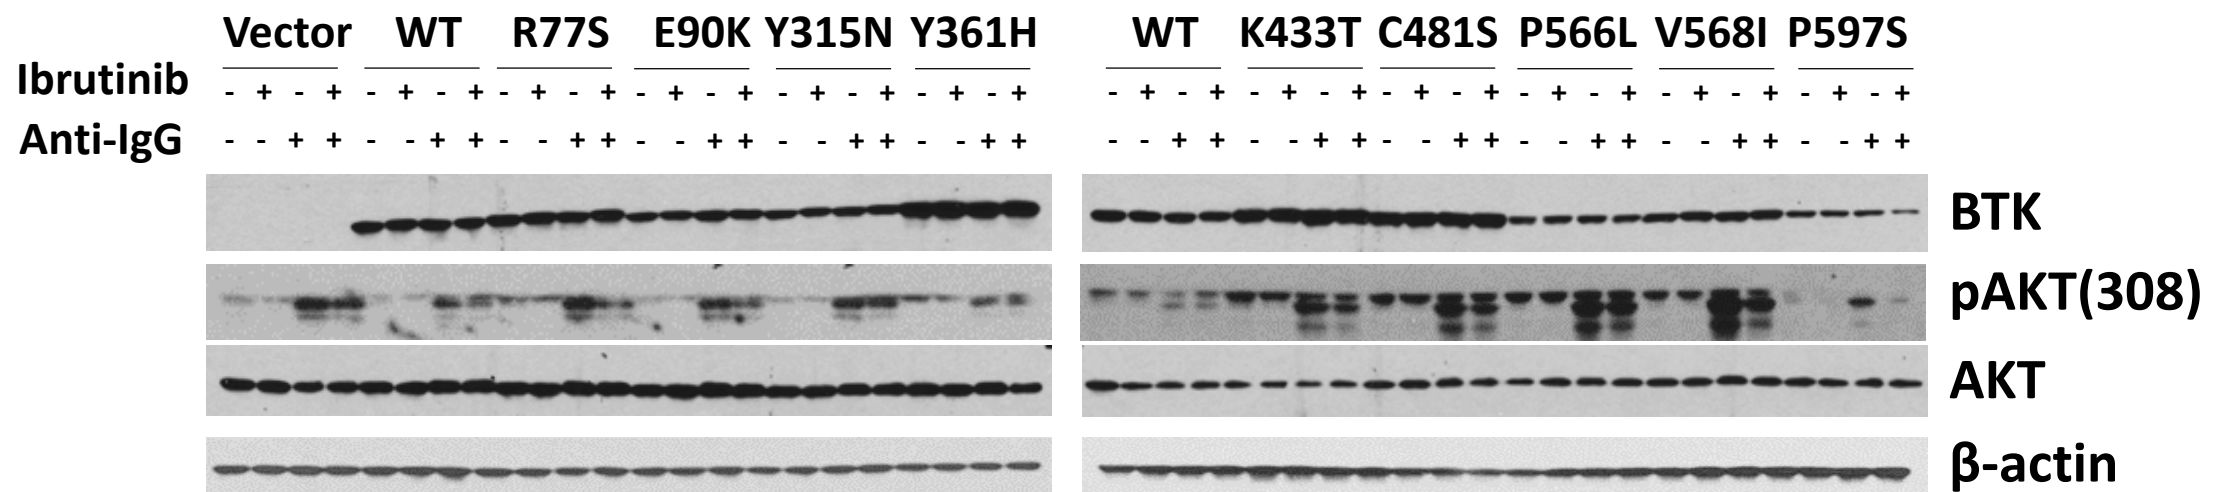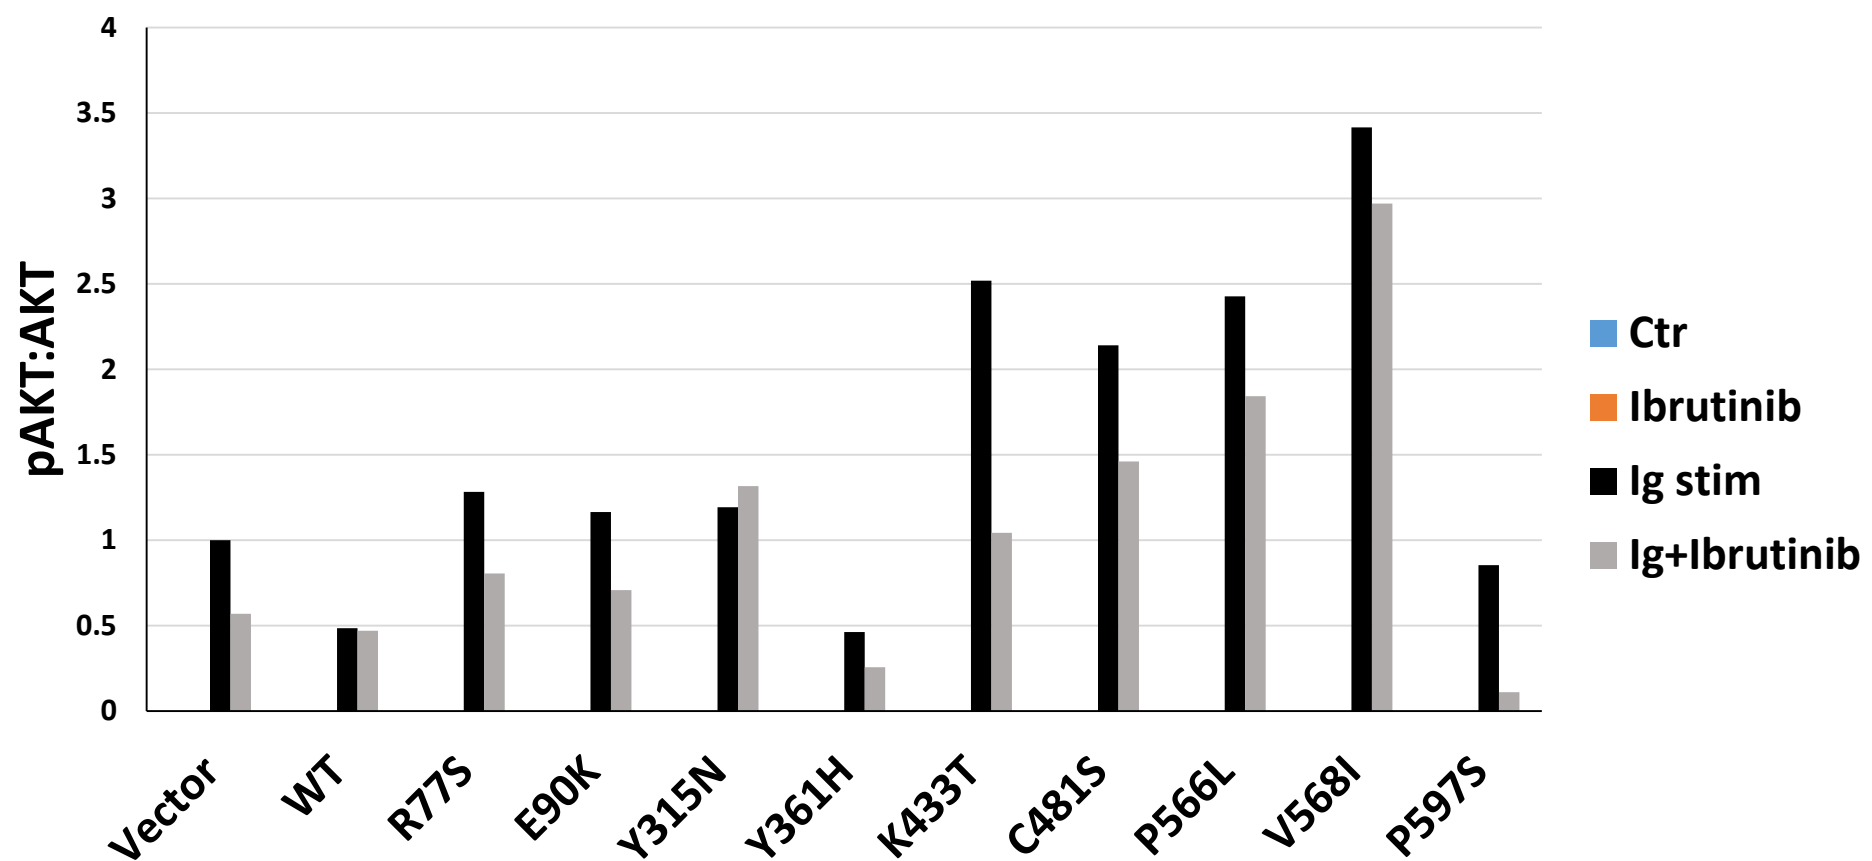

Figure S7



### OCI-LY7

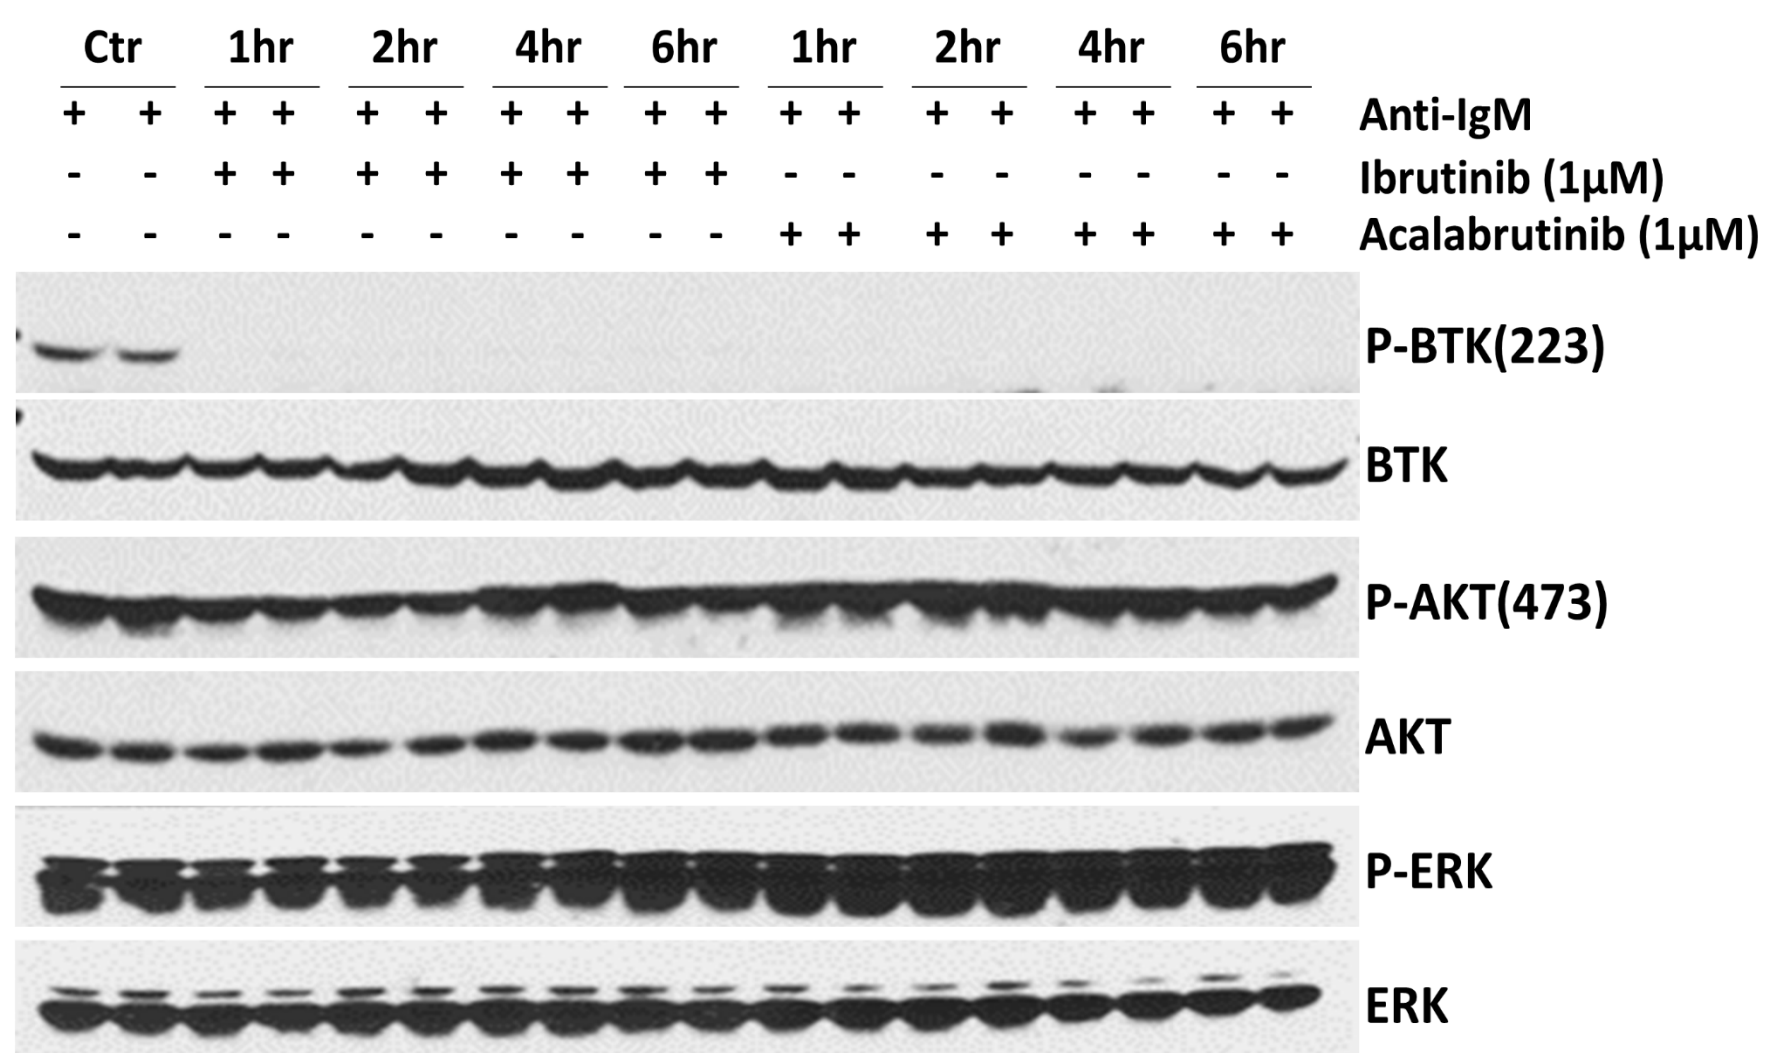

### SUDHL4

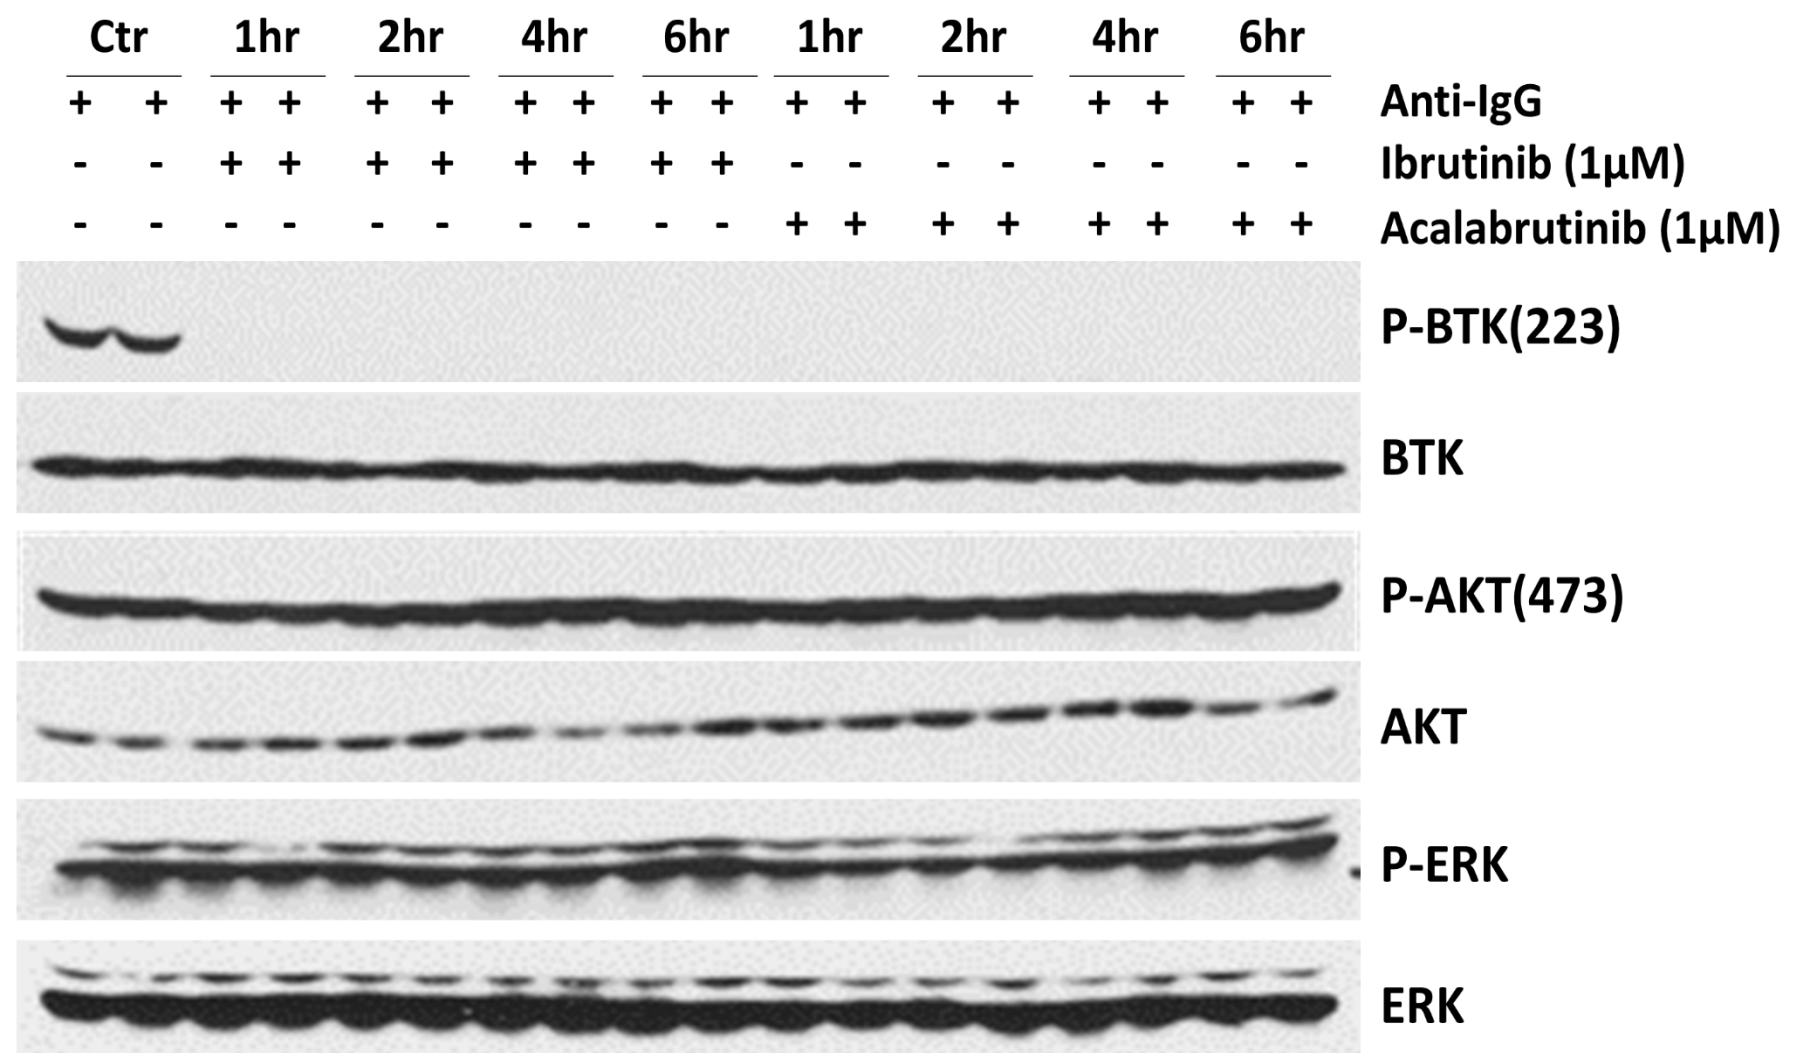

### HBL1

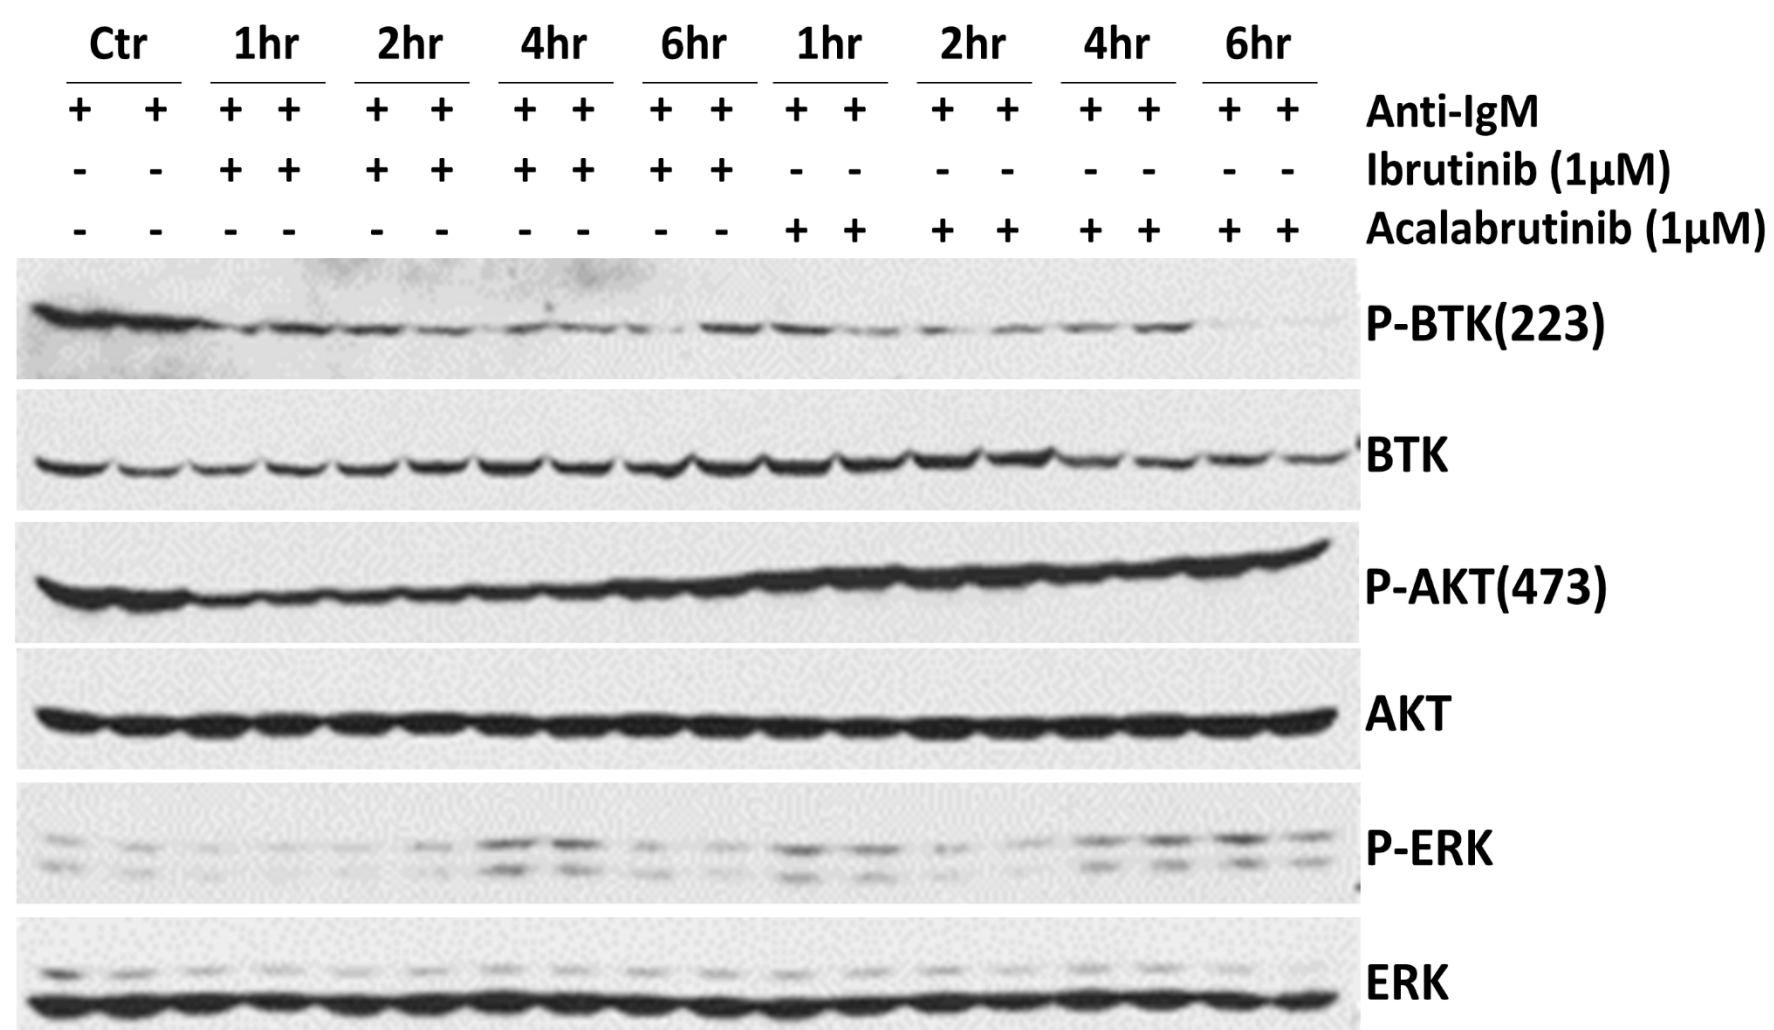

### TMD8

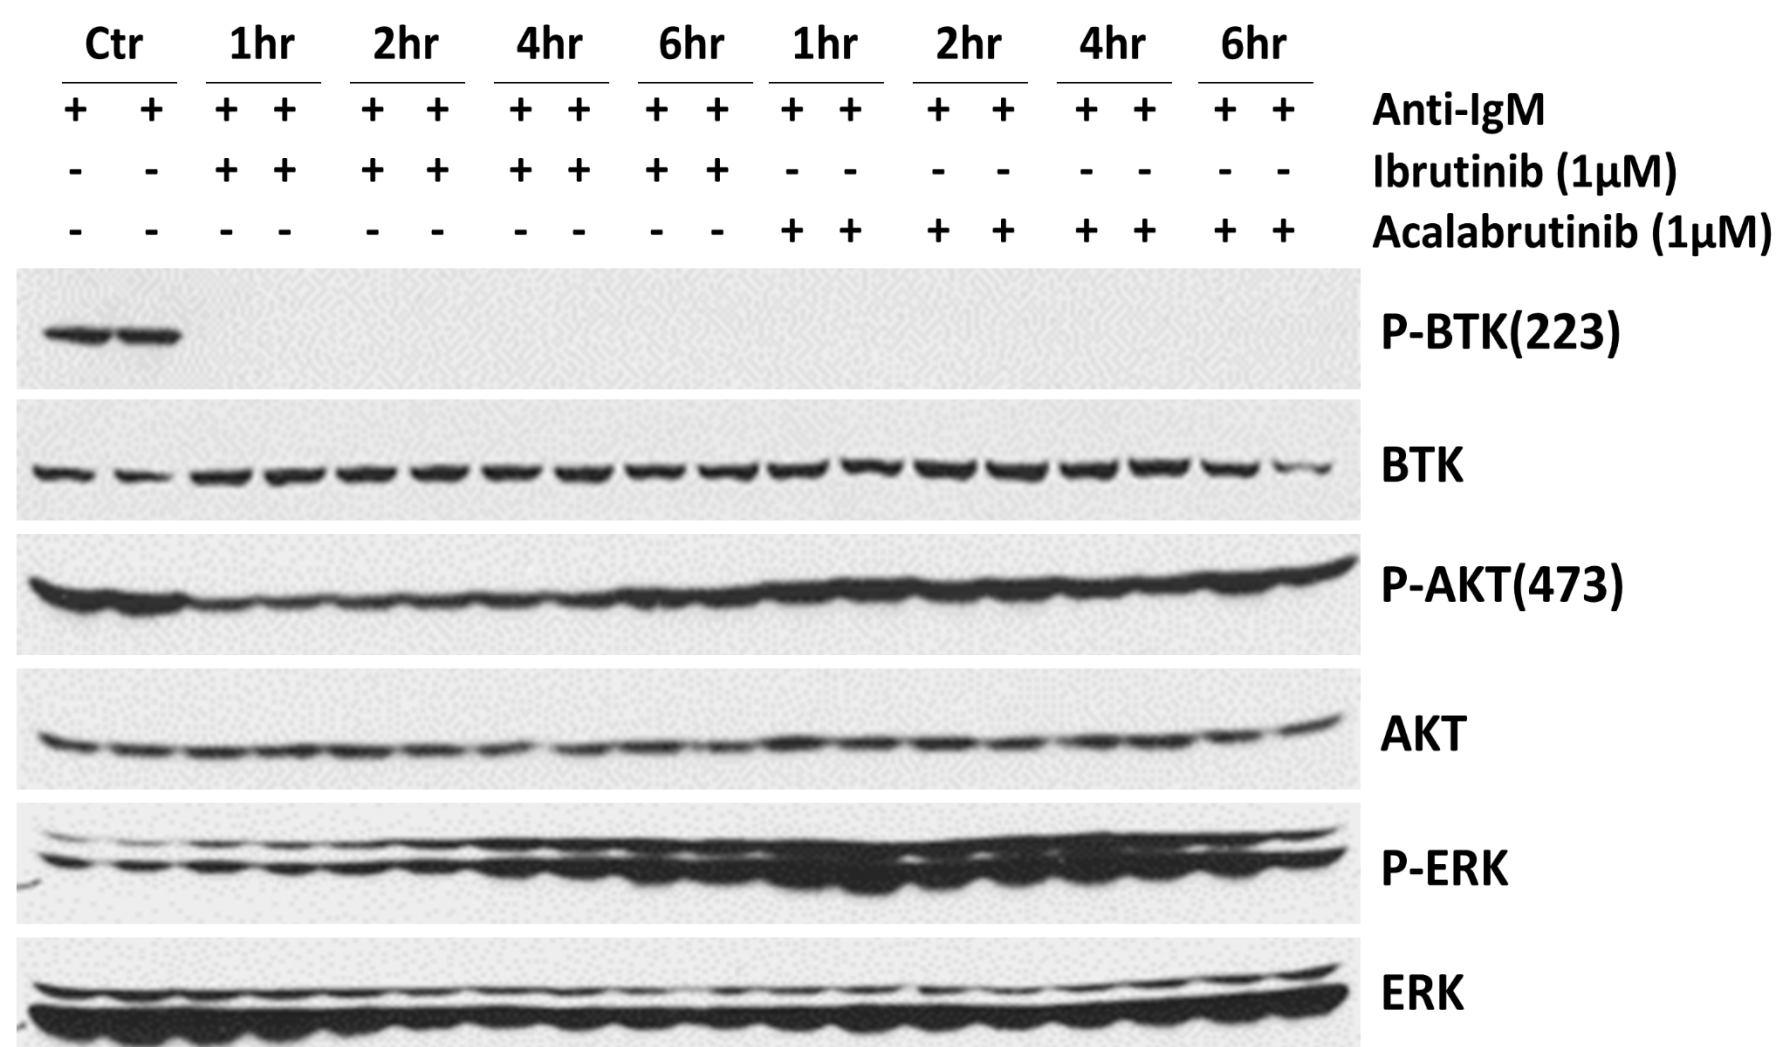

Figure S8



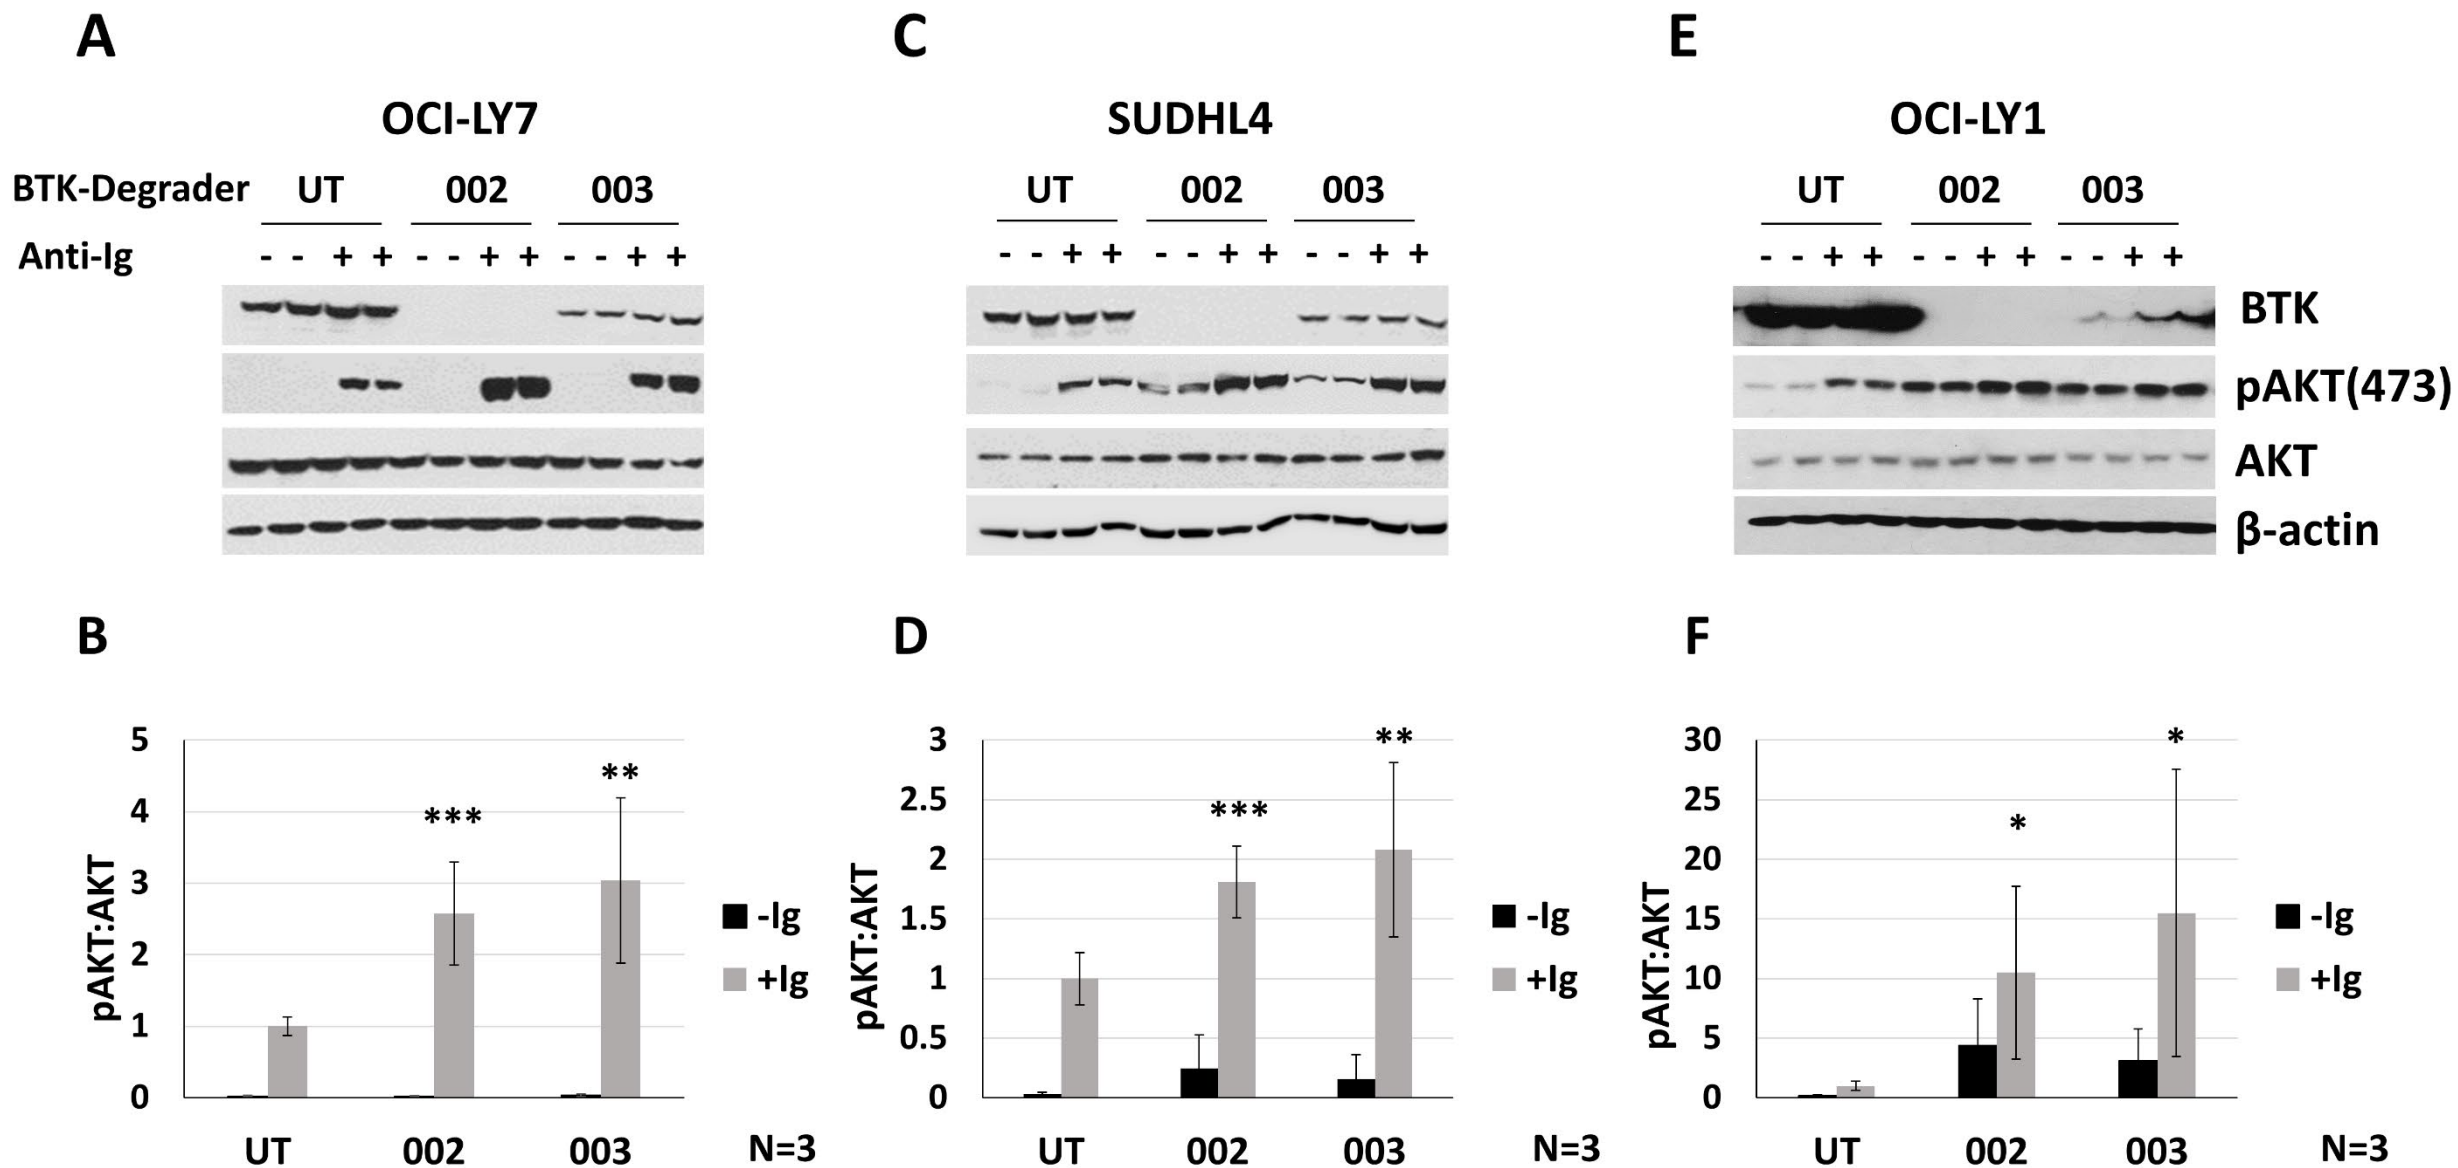

Figure S9

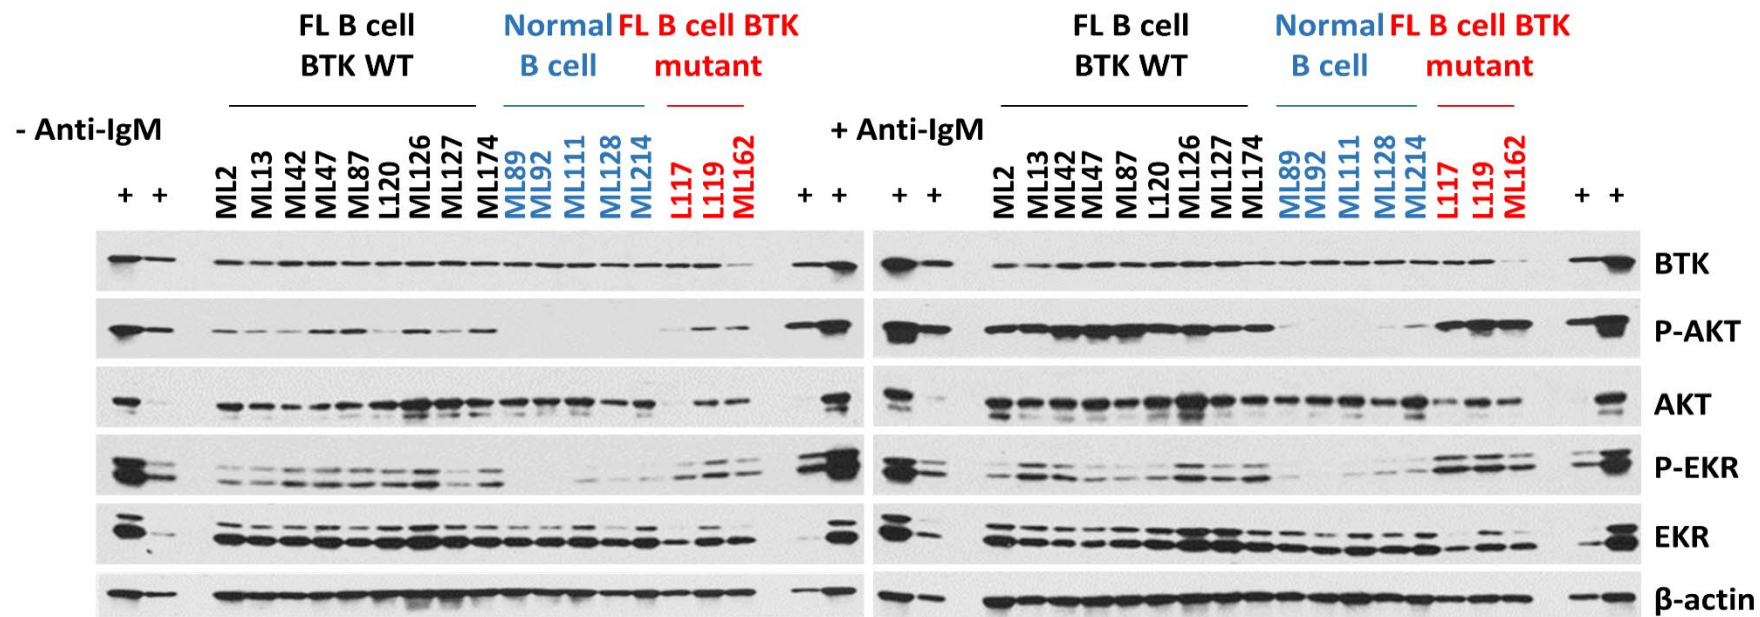

- Anti-IgM

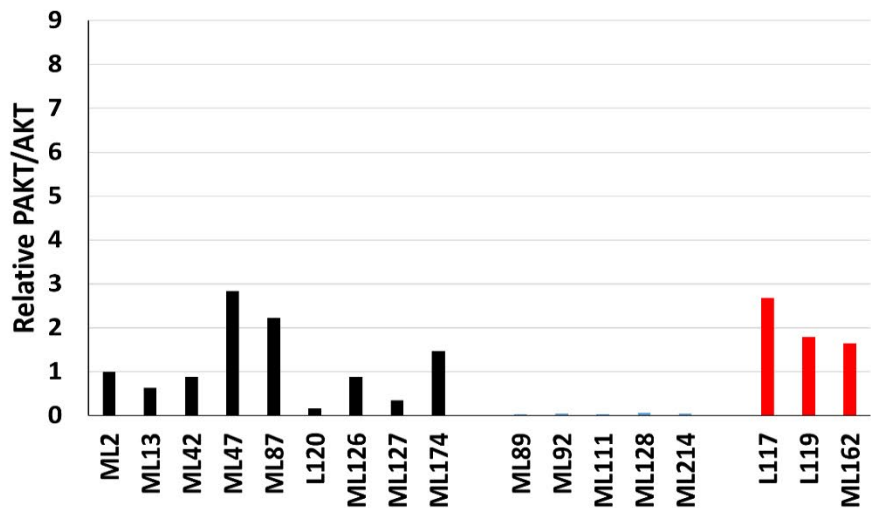

+ Anti-IgM

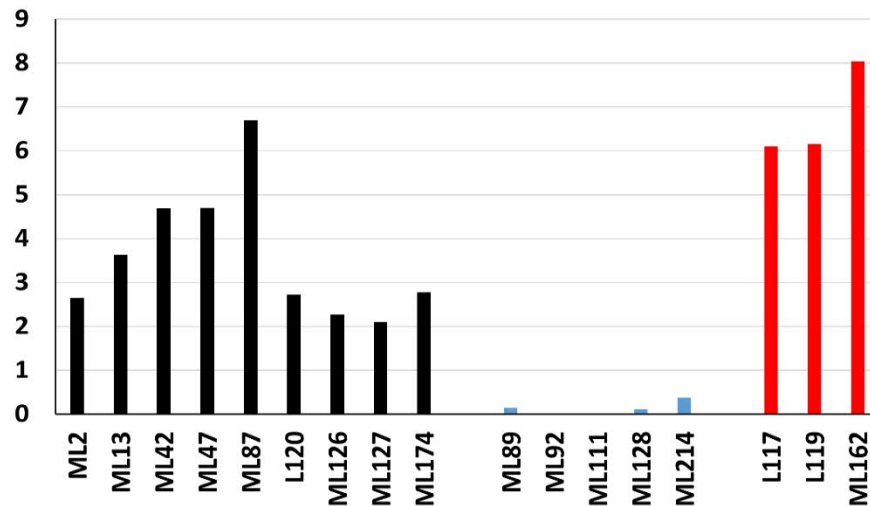

Figure S10

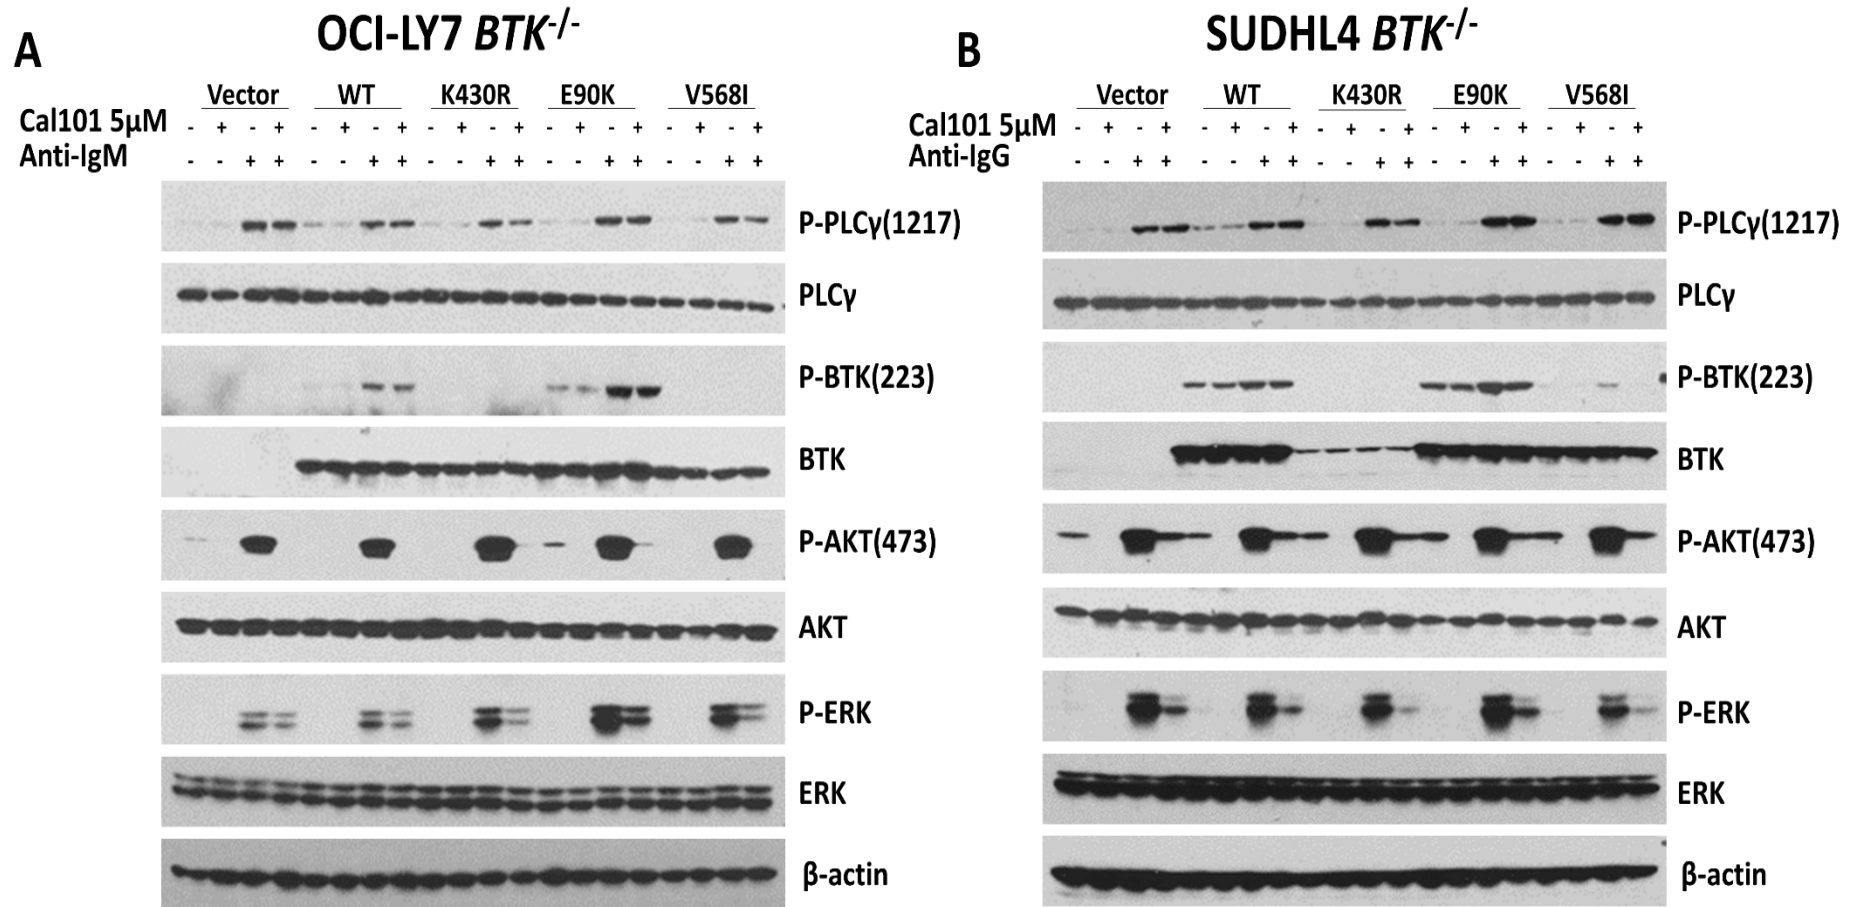

Figure S11

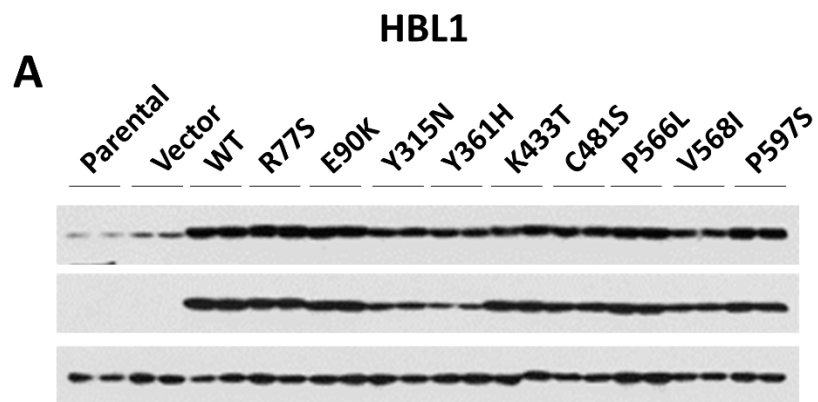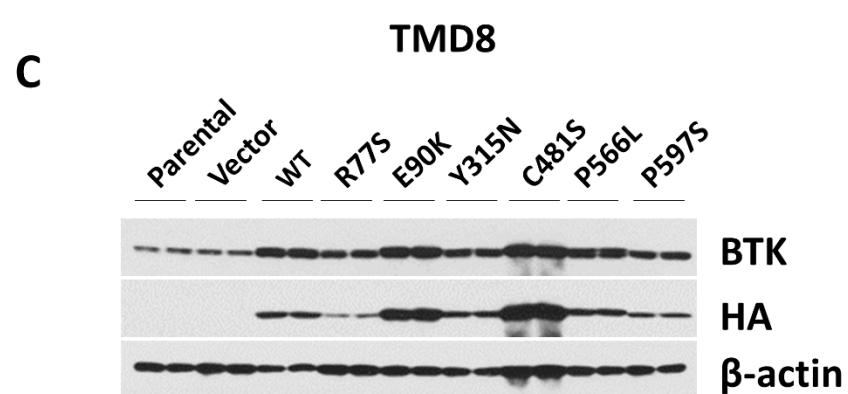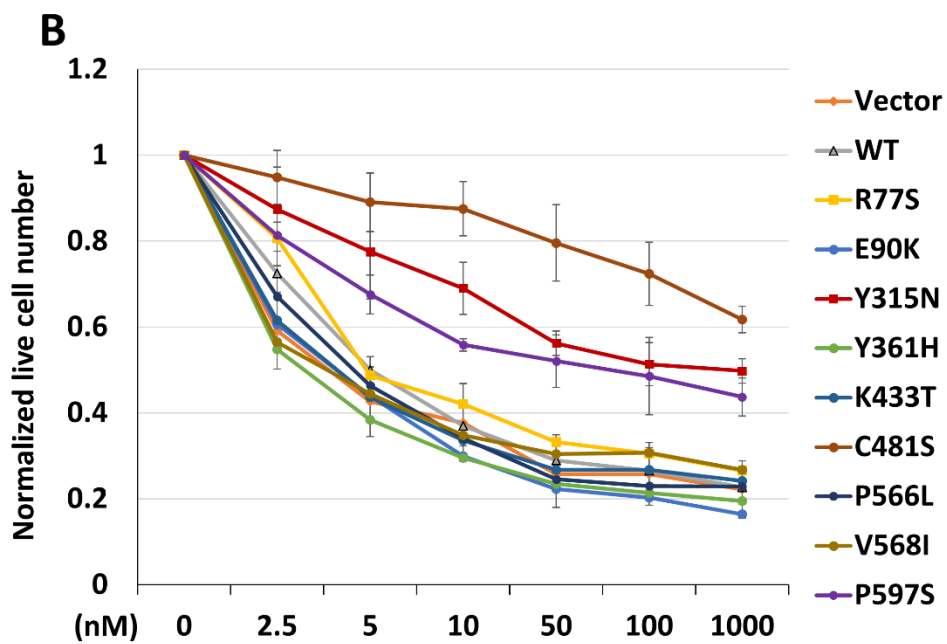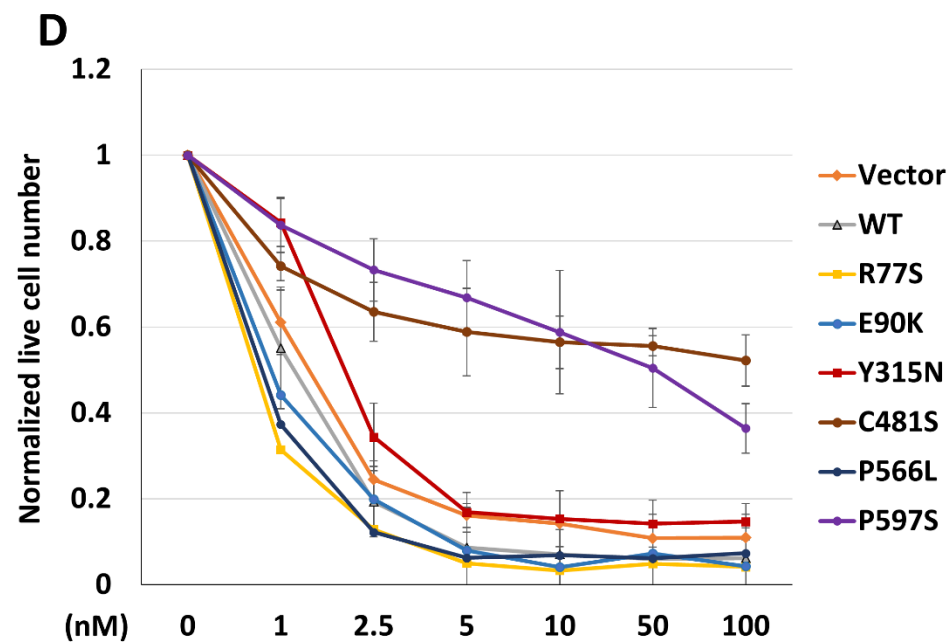

Figure S12
